# Supplementary material for: Assessing the Effect of Extreme Weather on Population Health Using Consumer-Grade Wearables in Rural Burkina Faso: Observational Panel Study
Source: PubMed Central journal article supplement (PMC10666008; doi:10.2196/46980), 2023-11-08
Supplement: mhealth_v11i1e46980_app3.pdf [file mhealth_v11i1e46980_app3.pdf]

**Table S1.** Results of Model 1 (WBGT or HI and total daily precipitation as predictors), Model 2 (temperature and total daily precipitation as predictors) and Model 3 (binary variable heat stress day/night as predictor) for daily activity (steps), sleep duration and nighttime HR. For the outcome of sleep duration Model 1 had an AIC of 76228, Model 2 an AIC of 76230 and Model 3 an AIC of 76309. For the outcome steps Model 1 had an AIC of 454907, Model 2 had an AIC of 454947 and Model 3 had an AIC of 454941. For the outcome variable nighttime HR Model 1 had an AIC of 21049, Model 2 had an AIC of 21049 and Model 3 had an AIC of 21047.

| Independent        | Predictor                                   | Model 1  |       |         | Model 2  |       |         | Model 3  |       |         |
|--------------------|---------------------------------------------|----------|-------|---------|----------|-------|---------|----------|-------|---------|
|                    |                                             | Estimate | SE    | p-value | Estimate | SE    | p-value | Estimate | SE    | p-value |
| Sleep duration (h) | Intercept                                   | 8.11     | 0.10  | <.001   | 8.24     | 0.11  | <.001   | 7.51     | 0.08  | <.001   |
|                    | HI <sub>min</sub>                           | -0.04    | 0.00  | <.001   |          |       |         |          |       |         |
|                    | Daily Precipitation                         | 0.01     | 0.00  | <.001   | 0.01     | 0.00  | <.001   |          |       |         |
|                    | Temp <sub>min</sub>                         |          |       |         | -0.05    | 0.00  | <.001   |          |       |         |
|                    | Heat stress night (HI <sub>min</sub> ≥25°C) |          |       |         |          |       |         | -0.24    | 0.03  | <.001   |
|                    | HI <sub>min</sub> <25°C                     |          |       |         |          |       |         | Ref      | Ref   | Ref     |
|                    | August 2021                                 | -0.41    | 0.07  | <.001   | -0.46    | 0.07  | <.001   | -0.67    | 0.05  | <.001   |
|                    | September 2021                              | -0.72    | 0.07  | <.001   | -0.77    | 0.07  | <.001   | -1.05    | 0.05  | <.001   |
|                    | October 2021                                | -0.56    | 0.07  | <.001   | -0.61    | 0.06  | <.001   | -0.91    | 0.05  | <.001   |
|                    | November 2021                               | -0.39    | 0.05  | <.001   | -0.42    | 0.05  | <.001   | -0.59    | 0.05  | <.001   |
|                    | December 2021                               | -0.18    | 0.05  | <.001   | -0.19    | 0.05  | <.001   | -0.24    | 0.04  | <.001   |
|                    | January 2022                                | Ref      | Ref   | Ref     | Ref      | Ref   | Ref     | Ref      | Ref   | Ref     |
|                    | February 2022                               | -0.16    | 0.05  | <.001   | -0.16    | 0.05  | =.001   | -0.28    | 0.05  | <.001   |
|                    | March 2022                                  | -0.23    | 0.06  | <.001   | -0.22    | 0.06  | <.001   | -0.54    | 0.05  | <.001   |
| April 2022         | -0.65                                       | 0.08     | <.001 | -0.67   | 0.08     | <.001 | -1.03   | 0.05     | <.001 |         |
| May 2022           | -0.46                                       | 0.08     | <.001 | -0.52   | 0.08     | <.001 | -0.86   | 0.06     | <.001 |         |
| June 2022          | -0.64                                       | 0.08     | <.001 | -0.70   | 0.07     | <.001 | -0.96   | 0.05     | <.001 |         |
| Weekend            | -0.06                                       | 0.02     | <.001 | -0.06   | 0.02     | =.01  | -0.08   | 0.02     | <.001 |         |
| Weekday            | Ref                                         | Ref      | Ref   | Ref     | Ref      | Ref   | Ref     | Ref      | Ref   |         |
| Young adults       | 0.33                                        | 0.31     | =.29  | 0.33    | 0.31     | =.28  |         |          |       |         |
| Middle-aged adults | Ref                                         | Ref      | Ref   | Ref     | Ref      | Ref   |         |          |       |         |
| Older adults       | -0.63                                       | 0.28     | =.02  | -0.63   | 0.28     | =.02  |         |          |       |         |

|                        |                                             |         |         |       |          |         |       |         |         |       |
|------------------------|---------------------------------------------|---------|---------|-------|----------|---------|-------|---------|---------|-------|
|                        | Underweight                                 | 0.24    | 0.30    | =.42  | 0.24     | 0.30    | =.42  |         |         |       |
|                        | Healthy weight                              | Ref     | Ref     | Ref   | Ref      | Ref     | Ref   |         |         |       |
|                        | Overweight                                  | -0.23   | 0.19    | =.22  | -0.24    | 0.19    | =.21  |         |         |       |
| Daily activity (steps) | Intercept                                   | 1559.64 | 3636.14 | =.67  | 10109.31 | 602.53  | <.001 | 9337.23 | 348.87  | <.001 |
|                        | WBGT <sub>max</sub>                         | 605.64  | 272.97  | =.03  |          |         |       |         |         |       |
|                        | WBGT <sub>max</sub> <sup>2</sup>            | -11.48  | 4.97    | =.02  |          |         |       |         |         |       |
|                        | Daily Precipitation                         | -33.94  | 272.97  | <.001 |          |         |       |         |         |       |
|                        | Temp <sub>max</sub>                         |         |         |       | -23.34   | 14.84   | =.12  |         |         |       |
|                        | Heat stress day (WBGT <sub>max</sub> ≥30°C) |         |         |       |          |         |       | -64.41  | 100.03  | =.52  |
|                        | WBGT <sub>max</sub> <30°C                   |         |         |       |          |         |       | Ref     | Ref     | Ref   |
|                        | Heavy precipitation (≥20mm)                 |         |         |       |          |         |       | -854.90 | 262.93  | <.001 |
|                        | Precipitation <20mm                         |         |         |       |          |         |       | Ref     | Ref     | Ref   |
|                        | August 2021                                 | 5448.00 | 271.37  | <.001 | 5137.33  | 169.43  | <.001 | 5323.41 | 175.26  | <.001 |
|                        | September 2021                              | 2343.91 | 272.71  | <.001 | 2254.83  | 169.80  | <.001 | 2306.46 | 185.77  | <.001 |
|                        | October 2021                                | 1190.29 | 265.20  | <.001 | 1188.71  | 156.99  | <.001 | 1163.19 | 174.62  | <.001 |
|                        | November 2021                               | 2305.76 | 226.64  | <.001 | 2577.40  | 161.48  | <.001 | 2476.49 | 146.08  | <.001 |
|                        | December 2021                               | 221.07  | 158.48  | =.16  | 381.78   | 143.72  | =.01  | 335.13  | 140.57  | =.02  |
|                        | January 2022                                | Ref     | Ref     | Ref   | Ref      | Ref     | Ref   | Ref     | Ref     | Ref   |
|                        | February 2022                               | -4.88   | 172.21  | =.098 | 200.68   | 155.58  | =.20  | 120.94  | 146.59  | =.41  |
|                        | March 2022                                  | -284.42 | 227.17  | =.21  | 4.38     | 170.16  | =.98  | -121.49 | 149.41  | =.42  |
|                        | April 2022                                  | -102.29 | 250.82  | =.68  | 71.75    | 182.57  | =.69  | -37.21  | 164.06  | =.82  |
|                        | May 2022                                    | -320.65 | 262.56  | =.22  | -236.33  | 176.43  | =.18  | -318.66 | 167.74  | =.06  |
|                        | June 2022                                   | 1503.16 | 259.09  | <.001 | 1465.64  | 161.95  | <.001 | 1513.01 | 168.24  | <.001 |
|                        | Weekend                                     | -418.29 | 73.42   | <.001 | -415.23  | 73.47   | <.001 | -417.13 | 73.47   | <.001 |
|                        | Weekday                                     | Ref     | Ref     | Ref   | Ref      | Ref     | Ref   | Ref     | Ref     | Ref   |
|                        | Young adults                                | 1409.37 | 1393.38 | =.31  | 1418.60  | 1392.14 | =.31  | 1413.04 | 1391.71 | =.31  |
|                        | Middle-aged adults                          | Ref     | Ref     | Ref   | Ref      | Ref     | Ref   | Ref     | Ref     | Ref   |

|                            |                                             |          |         |       |          |         |       |          |         |       |
|----------------------------|---------------------------------------------|----------|---------|-------|----------|---------|-------|----------|---------|-------|
|                            | Older adults                                | -7463.63 | 1239.27 | <.001 | -7451.45 | 1238.17 | <.001 | -7448.25 | 1237.78 | <.001 |
| Average nighttime HR (bpm) | Intercept                                   | 70.72    | 2.82    | <.001 | 71.26    | 3.67    | <.001 | 70.12    | 1.19    | <.001 |
|                            | HI <sub>min</sub>                           | -0.08    | 0.26    | =.75  |          |         |       |          |         |       |
|                            | HI <sub>min</sub> <sup>2</sup>              | 0.00     | 0.01    | =.65  |          |         |       |          |         |       |
|                            | Daily Precipitation                         | -0.04    | 0.02    | =.05  | -0.04    | 0.02    | =.06  |          |         |       |
|                            | Temp <sub>min</sub>                         |          |         |       | -0.14    | 0.01    | =.67  |          |         |       |
|                            | Temp <sub>min</sub> <sup>2</sup>            |          |         |       | 0.00     | 0.01    | =.56  |          |         |       |
|                            | Heat stress night (HI <sub>min</sub> ≥25°C) |          |         |       |          |         |       | -0.27    | 0.38    | =.49  |
|                            | HI <sub>min</sub> <25°C                     |          |         |       |          |         |       | Ref      | Ref     | Ref   |
|                            | Heavy precipitation (≥20mm)                 |          |         |       |          |         |       | -2.01    | 0.92    | =.003 |
|                            | Precipitation <20mm                         |          |         |       |          |         |       | Ref      | Ref     | Ref   |
|                            | August 2021                                 | -5.75    | 1.03    | <.001 | -5.78    | 0.96    | <.001 | -5.55    | 0.73    | <.001 |
|                            | September 2021                              | -2.57    | 1.01    | <.01  | -2.60    | 0.95    | =.01  | -2.34    | 0.71    | <.001 |
|                            | October 2021                                | -1.65    | 1.00    | =.10  | -1.68    | 0.93    | =.07  | -1.40    | 0.71    | =.05  |
|                            | November 2021                               | -1.48    | 0.82    | =.07  | -1.50    | 0.78    | =.06  | -1.44    | 0.70    | =.04  |
|                            | December 2021                               | -1.26    | 0.70    | =.07  | -1.26    | 0.70    | =.07  | -1.26    | 0.69    | =.07  |
|                            | January 2022                                | Ref      | Ref     | Ref   | Ref      | Ref     | Ref   | Ref      | Ref     | Ref   |
|                            | February 2022                               | -1.60    | 0.73    | =.03  | -1.61    | 0.73    | =.03  | -1.60    | 0.70    | =.02  |
|                            | March 2022                                  | -2.96    | 0.98    | <.001 | -3.08    | 0.96    | <.001 | -2.70    | 0.72    | <.001 |
|                            | April 2022                                  | -0.96    | 1.06    | =.36  | -1.10    | 1.02    | =.28  | -0.43    | 0.74    | =.56  |
|                            | May 2022                                    | -4.13    | 1.14    | <.001 | -4.22    | 1.08    | <.001 | -3.42    | 0.78    | <.001 |
|                            | June 2022                                   | -4.35    | 1.06    | <.001 | -5.78    | 1.00    | <.001 | -3.93    | 0.76    | <.001 |
|                            | Males                                       | -2.62    | 1.40    | =.07  | -2.62    | 1.40    | =.07  | -2.62    | 1.40    | =.07  |
|                            | Females                                     | Ref      | Ref     | Ref   | Ref      | Ref     | Ref   | Ref      | Ref     | Ref   |
|                            | Young adults                                | 12.14    | 4.12    | =.01  | 12.12    | 4.12    | =.01  | 12.15    | 4.13    | =.01  |
|                            | Middle-aged adults                          | Ref      | Ref     | Ref   | Ref      | Ref     | Ref   | Ref      | Ref     | Ref   |
|                            | Older adults                                | -0.81    | 2.30    | =.73  | -0.81    | 2.30    | =.73  | -0.78    | 2.30    | =.74  |

|  |                |       |      |      |       |      |      |       |      |      |
|--|----------------|-------|------|------|-------|------|------|-------|------|------|
|  | Underweight    | -4.78 | 2.65 | =.08 | -4.78 | 2.65 | =.08 | -4.76 | 2.65 | =.08 |
|  | Healthy weight | Ref   | Ref  | Ref  | Ref   | Ref  | Ref  | Ref   | Ref  | Ref  |
|  | Overweight     | 3.50  | 1.80 | =.06 | 3.51  | 1.80 | =.06 | 3.47  | 1.80 | =.06 |

**Table S2.** Fully adjusted models for the dataset with a complete case cutoff of 50%: Model 1 (WBGT or HI and total daily precipitation as predictors), Model 2 (temperature and total daily precipitation as predictors) and Model 3 (binary variable heat stress day/night as predictor) for daily activity and sleep duration. For sleep duration as the outcome variable Model 1 had an AIC of 56290, Model 2 an AIC of 56291 and model 3 had an AIC of 56461. For the outcome steps Model 1 had an AIC of 374919, Model 2 had an AIC of 374943 and Model 3 had an AIC of 374944.

|                    |                                             | Model 1  |       |         | Model 2  |       |         | Model 3  |       |         |
|--------------------|---------------------------------------------|----------|-------|---------|----------|-------|---------|----------|-------|---------|
| Independent        | Predictor                                   | Estimate | SE    | p-value | Estimate | SE    | p-value | Estimate | SE    | p-value |
| Sleep duration (h) | Intercept                                   | 7.96     | 0.12  | <.001   | 8.09     | 0.13  | <.001   | 7.40     | 0.09  | <.001   |
|                    | HI <sub>min</sub>                           | -0.04    | 0.00  | <.001   |          |       |         |          |       |         |
|                    | Daily Precipitation                         | 0.01     | 0.00  | <.001   | 0.01     | 0.00  | <.001   |          |       |         |
|                    | Temp <sub>min</sub>                         |          |       |         | -0.04    | 0.01  | <.001   |          |       |         |
|                    | Heat stress night (HI <sub>min</sub> ≥25°C) |          |       |         |          |       |         | -0.24    | 0.04  | <.001   |
|                    | HI <sub>min</sub> <25°C                     |          |       |         |          |       |         | Ref      | Ref   | Ref     |
|                    | August 2021                                 | -0.29    | 0.08  | <.001   | -0.34    | 0.08  | <.001   | -0.54    | 0.06  | <.001   |
|                    | September 2021                              | -0.67    | 0.08  | <.001   | -0.71    | 0.08  | <.001   | -0.97    | 0.06  | <.001   |
|                    | October 2021                                | -0.50    | 0.08  | <.001   | -0.55    | 0.07  | <.001   | -0.83    | 0.06  | <.001   |
|                    | November 2021                               | -0.36    | 0.06  | <.001   | -0.39    | 0.06  | <.001   | -0.56    | 0.05  | <.001   |
|                    | December 2021                               | -0.14    | 0.05  | <.001   | -0.15    | 0.05  | <.001   | -0.20    | 0.05  | <.001   |
|                    | January 2022                                | Ref      | Ref   | Ref     | Ref      | Ref   | Ref     | Ref      | Ref   | Ref     |
|                    | February 2022                               | -0.14    | 0.05  | =.01    | -0.14    | 0.05  | =.001   | -0.25    | 0.05  | <.001   |
| March 2022         | -0.23                                       | 0.07     | <.001 | -0.22   | 0.07     | <.001 | -0.52   | 0.05     | <.001 |         |
| April 2022         | -0.58                                       | 0.09     | <.001 | -0.60   | 0.08     | <.001 | -0.93   | 0.06     | <.001 |         |
| May 2022           | -0.42                                       | 0.09     | <.001 | -0.47   | 0.09     | <.001 | -0.79   | 0.06     | <.001 |         |
| June 2022          | -0.61                                       | 0.08     | <.001 | -0.67   | 0.08     | <.001 | -0.91   | 0.06     | <.001 |         |
| Weekend            | -0.08                                       | 0.03     | <.001 | -0.08   | 0.03     | =.01  | -0.09   | 0.03     | <.001 |         |
| Weekday            | Ref                                         | Ref      | Ref   | Ref     | Ref      | Ref   | Ref     | Ref      | Ref   |         |

|                        |                                             |         |         |       |          |        |       |         |        |       |
|------------------------|---------------------------------------------|---------|---------|-------|----------|--------|-------|---------|--------|-------|
|                        | Young adults                                | 0.57    | 0.30    | =.06  | 0.57     | 0.30   | =.06  | 0.59    | 0.30   | =.05  |
|                        | Middle-aged adults                          | Ref     | Ref     | Ref   | Ref      | Ref    | Ref   | Ref     | Ref    | Ref   |
|                        | Older adults                                | -1.94   | 0.67    | <.001 | -0.57    | 0.30   | =.01  | -2.13   | 0.65   | <.001 |
|                        | Underweight                                 | 0.11    | 0.38    | =.77  | 0.11     | 0.38   | =.78  |         |        |       |
|                        | Healthy weight                              | Ref     | Ref     | Ref   | Ref      | Ref    | Ref   |         |        |       |
|                        | Overweight                                  | -0.23   | 0.20    | =.26  | -0.23    | 0.20   | =.25  |         |        |       |
| Daily activity (steps) | Intercept                                   | 2772.31 | 4007.31 | =.49  | 10270.84 | 670.34 | <.001 | 9319.30 | 408.73 | <.001 |
|                        | WBGT <sub>max</sub>                         | 518.00  | 300.57  | =.08  |          |        |       |         |        |       |
|                        | WBGT <sub>max</sub> <sup>2</sup>            | -10.03  | 5.47    | =.07  |          |        |       |         |        |       |
|                        | Daily Precipitation                         | -30.83  | 5.77    | <.001 |          |        |       |         |        |       |
|                        | Temp <sub>max</sub>                         |         |         |       | -28.77   | 16.06  | =.07  |         |        |       |
|                        | Heat stress day (WBGT <sub>max</sub> ≥30°C) |         |         |       |          |        |       | -58.44  | 109.72 | =.59  |
|                        | WBGT <sub>max</sub> <30°C                   |         |         |       |          |        |       | Ref     | Ref    | Ref   |
|                        | Heavy precipitation (≥20mm)                 |         |         |       |          |        |       | -541.96 | 293.30 | =.06  |
|                        | Precipitation <20mm                         |         |         |       |          |        |       | Ref     | Ref    | Ref   |
|                        | August 2021                                 | 5597.90 | 301.69  | <.001 | 5218.61  | 189.64 | <.001 | 5366.02 | 196.15 | <.001 |
|                        | September 2021                              | 2179.47 | 302.32  | <.001 | 2004.78  | 189.11 | <.001 | 2045.41 | 206.27 | <.001 |
|                        | October 2021                                | 1278.28 | 294.81  | <.001 | 1203.46  | 176.26 | <.001 | 1152.88 | 195.74 | <.001 |
|                        | November 2021                               | 2345.43 | 252.56  | <.001 | 2566.02  | 181.08 | <.001 | 2438.16 | 165.07 | <.001 |
|                        | December 2021                               | 148.99  | 176.96  | =.40  | 288.70   | 160.60 | =.07  | 231.20  | 157.36 | =.14  |
|                        | January 2022                                | Ref     | Ref     | Ref   | Ref      | Ref    | Ref   | Ref     | Ref    | Ref   |
|                        | February 2022                               | 117.15  | 188.42  | =.53  | 302.67   | 169.13 | =.07  | 203.54  | 159.46 | =.20  |
|                        | March 2022                                  | -260.71 | 248.71  | =.29  | -19.94   | 183.22 | =.91  | -176.68 | 160.34 | =.27  |
|                        | April 2022                                  | -33.57  | 273.99  | =.90  | 88.98    | 196.10 | =.65  | -63.98  | 176.38 | =.72  |
|                        | May 2022                                    | -341.31 | 286.17  | =.23  | -315.36  | 188.48 | =.09  | -435.41 | 179.42 | =.02  |
|                        | June 2022                                   | 1580.39 | 283.11  | <.001 | 1472.72  | 174.04 | <.001 | 1490.24 | 181.15 | <.001 |
|                        | Weekend                                     | -488.41 | 81.10   | <.001 | -487.38  | 81.15  | <.001 | -488.76 | 81.15  | <.001 |

|  |                    |          |         |       |          |         |       |          |         |       |
|--|--------------------|----------|---------|-------|----------|---------|-------|----------|---------|-------|
|  | Weekday            | Ref      | Ref     | Ref   | Ref      | Ref     | Ref   | Ref      | Ref     | Ref   |
|  | Young adults       | 1814.55  | 1646.40 | =.27  | 1825.72  | 1643.99 | =.27  | 1823.17  | 1643.97 | =.27  |
|  | Middle-aged adults | Ref      | Ref     | Ref   | Ref      | Ref     | Ref   | Ref      | Ref     | Ref   |
|  | Older adults       | -7383.98 | 1647.47 | <.001 | -7375.28 | 1645.06 | <.001 | -7378.31 | 1645.04 | <.001 |
