# Supplementary material for: Assessing the Effect of Extreme Weather on Population Health Using Consumer-Grade Wearables in Rural Burkina Faso: Observational Panel Study
Source: JMIR Mhealth Uhealth. 2023 Nov 8;11:e46980. doi: 10.2196/46980 (PMC10666008; doi:10.2196/46980)
Supplement: Multimedia Appendix 2 [file mhealth_v11i1e46980_app2.pdf]

# CP1- P5 Étude complète Burkina Faso

---

## SURVEY IDENTIFICATION INFORMATION QUESTIONNAIRE DESCRIPTION

### DÉTAILS DES PARTICIPANTS À L'ÉTUDE

No sub-sections, No rosters, Questions: 3, Static texts: 1.

### DISTRIBUTION/RETOUR DE CAPTEUR

No sub-sections, Rosters: 2, Questions: 28.

### QUESTIONNAIRE D'ACCEPTATION

No sub-sections, No rosters, Questions: 29, Static texts: 1.

### JOURNAL D'ACTIVITÉ

No sub-sections, No rosters, Questions: 8.

### APPENDIX A — CATEGORIES

### LEGEND

SURVEY IDENTIFICATION INFORMATION  
QUESTIONNAIRE DESCRIPTION

Basic information

Title CP1- P5 Étude complète Burkina Faso

Survey data information

Study type Integrated Survey

Kind of data Aggregate data [agg]

Survey information

Country Burkina Faso

Year 2020

Languages French

Funding DFG

# JOURNAL D'ACTIVITÉ

|                                                                                |                                                                                                                                                                                                                                                                                                                                                                                                                                                                                                                                                                                                                                                                                                                                                                                                                                                                                                                                                                                                                                                                                                                                                                                                                          |
|--------------------------------------------------------------------------------|--------------------------------------------------------------------------------------------------------------------------------------------------------------------------------------------------------------------------------------------------------------------------------------------------------------------------------------------------------------------------------------------------------------------------------------------------------------------------------------------------------------------------------------------------------------------------------------------------------------------------------------------------------------------------------------------------------------------------------------------------------------------------------------------------------------------------------------------------------------------------------------------------------------------------------------------------------------------------------------------------------------------------------------------------------------------------------------------------------------------------------------------------------------------------------------------------------------------------|
| Quelle activité avez-vous fait après vous être levé ce matin? (choix multiple) | <div>MULTI-SELECT: ORDEREDafter_gettingup</div> <div><div>01</div><input type="checkbox"/> travaillant à la ferme</div> <div><div>02</div><input type="checkbox"/> cuisine</div> <div><div>03</div><input type="checkbox"/> vendre des produits sur le marché</div> <div><div>04</div><input type="checkbox"/> élevage d'animaux</div> <div><div>05</div><input type="checkbox"/> prendre soin des enfants</div> <div><div>06</div><input type="checkbox"/> prendre soin de son mari / femme</div> <div><div>07</div><input type="checkbox"/> prendre soin des membres de la famille</div> <div><div>08</div><input type="checkbox"/> va à l'école</div> <div><div>09</div><input type="checkbox"/> chercher de l'eau dans le puits</div> <div><div>10</div><input type="checkbox"/> récolte</div> <div><div>11</div><input type="checkbox"/> travailler sur le terrain</div> <div><div>12</div><input type="checkbox"/> je me reposais</div> <div><div>13</div><input type="checkbox"/> regarder la télévision</div> <div><div>14</div><input type="checkbox"/> aller au bar</div> <div><div>15</div><input type="checkbox"/> aller au restaurant</div> <div><div>16</div><input type="checkbox"/> faire du sport</div> |
|--------------------------------------------------------------------------------|--------------------------------------------------------------------------------------------------------------------------------------------------------------------------------------------------------------------------------------------------------------------------------------------------------------------------------------------------------------------------------------------------------------------------------------------------------------------------------------------------------------------------------------------------------------------------------------------------------------------------------------------------------------------------------------------------------------------------------------------------------------------------------------------------------------------------------------------------------------------------------------------------------------------------------------------------------------------------------------------------------------------------------------------------------------------------------------------------------------------------------------------------------------------------------------------------------------------------|

[And 5 other symbols \[3\]](#)

|                                                                |                                                                                                                                                                                                                                                                                                                                                                                                                                                                                                                                                                                                                                                                                                                                                                                                                                                                                                                                                                                                                                                                                                                                                                                                                                                                                                                                                                                                                                                                                                                                                                                                                                                                                                                  |
|----------------------------------------------------------------|------------------------------------------------------------------------------------------------------------------------------------------------------------------------------------------------------------------------------------------------------------------------------------------------------------------------------------------------------------------------------------------------------------------------------------------------------------------------------------------------------------------------------------------------------------------------------------------------------------------------------------------------------------------------------------------------------------------------------------------------------------------------------------------------------------------------------------------------------------------------------------------------------------------------------------------------------------------------------------------------------------------------------------------------------------------------------------------------------------------------------------------------------------------------------------------------------------------------------------------------------------------------------------------------------------------------------------------------------------------------------------------------------------------------------------------------------------------------------------------------------------------------------------------------------------------------------------------------------------------------------------------------------------------------------------------------------------------|
| Quelle activité as-tu pratiquée le midi? (choix multiple)      | <div> <div>MULTI-SELECT</div> <div>noon_activity</div> <div> <div>01</div> <div><input type="checkbox"/></div> <div>travaillant à la ferme</div> </div> <div> <div>02</div> <div><input type="checkbox"/></div> <div>cuisine</div> </div> <div> <div>03</div> <div><input type="checkbox"/></div> <div>vendre des produits sur le marché</div> </div> <div> <div>04</div> <div><input type="checkbox"/></div> <div>élevage d'animaux</div> </div> <div> <div>05</div> <div><input type="checkbox"/></div> <div>prendre soin des enfants</div> </div> <div> <div>06</div> <div><input type="checkbox"/></div> <div>prendre soin de son mari / femme</div> </div> <div> <div>07</div> <div><input type="checkbox"/></div> <div>prendre soin des membres de la famille</div> </div> <div> <div>08</div> <div><input type="checkbox"/></div> <div>va à l'école</div> </div> <div> <div>09</div> <div><input type="checkbox"/></div> <div>chercher de l'eau dans le puits</div> </div> <div> <div>10</div> <div><input type="checkbox"/></div> <div>récolte</div> </div> <div> <div>11</div> <div><input type="checkbox"/></div> <div>travailler sur le terrain</div> </div> <div> <div>12</div> <div><input type="checkbox"/></div> <div>je me reposais</div> </div> <div> <div>13</div> <div><input type="checkbox"/></div> <div>regarder la télévision</div> </div> <div> <div>14</div> <div><input type="checkbox"/></div> <div>aller au bar</div> </div> <div> <div>15</div> <div><input type="checkbox"/></div> <div>aller au restaurant</div> </div> <div> <div>16</div> <div><input type="checkbox"/></div> <div>faire du sport</div> </div> <div> <a href="#">And 5 other symbols [3]</a> </div> </div>      |
| Quelle activité avez-vous faite l'après-midi? (choix multiple) | <div> <div>MULTI-SELECT</div> <div>afternoon_activity</div> <div> <div>01</div> <div><input type="checkbox"/></div> <div>travaillant à la ferme</div> </div> <div> <div>02</div> <div><input type="checkbox"/></div> <div>cuisine</div> </div> <div> <div>03</div> <div><input type="checkbox"/></div> <div>vendre des produits sur le marché</div> </div> <div> <div>04</div> <div><input type="checkbox"/></div> <div>élevage d'animaux</div> </div> <div> <div>05</div> <div><input type="checkbox"/></div> <div>prendre soin des enfants</div> </div> <div> <div>06</div> <div><input type="checkbox"/></div> <div>prendre soin de son mari / femme</div> </div> <div> <div>07</div> <div><input type="checkbox"/></div> <div>prendre soin des membres de la famille</div> </div> <div> <div>08</div> <div><input type="checkbox"/></div> <div>va à l'école</div> </div> <div> <div>09</div> <div><input type="checkbox"/></div> <div>chercher de l'eau dans le puits</div> </div> <div> <div>10</div> <div><input type="checkbox"/></div> <div>récolte</div> </div> <div> <div>11</div> <div><input type="checkbox"/></div> <div>travailler sur le terrain</div> </div> <div> <div>12</div> <div><input type="checkbox"/></div> <div>je me reposais</div> </div> <div> <div>13</div> <div><input type="checkbox"/></div> <div>regarder la télévision</div> </div> <div> <div>14</div> <div><input type="checkbox"/></div> <div>aller au bar</div> </div> <div> <div>15</div> <div><input type="checkbox"/></div> <div>aller au restaurant</div> </div> <div> <div>16</div> <div><input type="checkbox"/></div> <div>faire du sport</div> </div> <div> <a href="#">And 5 other symbols [3]</a> </div> </div> |

|                                                           |                                                                                                                                                                                                                                                                                                                                                                                                                                                                                                                                                                                                                                                                                                                                                                                                                                                                                                                                                                                                                                                                                                                                                                                                                                                                                                                                                                                                                                                                                                                                                                                                                                                                                                                |
|-----------------------------------------------------------|----------------------------------------------------------------------------------------------------------------------------------------------------------------------------------------------------------------------------------------------------------------------------------------------------------------------------------------------------------------------------------------------------------------------------------------------------------------------------------------------------------------------------------------------------------------------------------------------------------------------------------------------------------------------------------------------------------------------------------------------------------------------------------------------------------------------------------------------------------------------------------------------------------------------------------------------------------------------------------------------------------------------------------------------------------------------------------------------------------------------------------------------------------------------------------------------------------------------------------------------------------------------------------------------------------------------------------------------------------------------------------------------------------------------------------------------------------------------------------------------------------------------------------------------------------------------------------------------------------------------------------------------------------------------------------------------------------------|
| Quelle activité as-tu pratiquée le soir? (choix multiple) | <div> <div>MULTI-SELECT</div> <div>evening_activity</div> <div> <div>01</div> <div><input type="checkbox"/></div> <div>travaillant à la ferme</div> </div> <div> <div>02</div> <div><input type="checkbox"/></div> <div>cuisine</div> </div> <div> <div>03</div> <div><input type="checkbox"/></div> <div>vendre des produits sur le marché</div> </div> <div> <div>04</div> <div><input type="checkbox"/></div> <div>élevage d'animaux</div> </div> <div> <div>05</div> <div><input type="checkbox"/></div> <div>prendre soin des enfants</div> </div> <div> <div>06</div> <div><input type="checkbox"/></div> <div>prendre soin de son mari / femme</div> </div> <div> <div>07</div> <div><input type="checkbox"/></div> <div>prendre soin des membres de la famille</div> </div> <div> <div>08</div> <div><input type="checkbox"/></div> <div>va à l'école</div> </div> <div> <div>09</div> <div><input type="checkbox"/></div> <div>chercher de l'eau dans le puits</div> </div> <div> <div>10</div> <div><input type="checkbox"/></div> <div>récolte</div> </div> <div> <div>11</div> <div><input type="checkbox"/></div> <div>travailler sur le terrain</div> </div> <div> <div>12</div> <div><input type="checkbox"/></div> <div>je me reposais</div> </div> <div> <div>13</div> <div><input type="checkbox"/></div> <div>regarder la télévision</div> </div> <div> <div>14</div> <div><input type="checkbox"/></div> <div>aller au bar</div> </div> <div> <div>15</div> <div><input type="checkbox"/></div> <div>aller au restaurant</div> </div> <div> <div>16</div> <div><input type="checkbox"/></div> <div>faire du sport</div> </div> <div> <a href="#">And 5 other symbols [3]</a> </div> </div> |
|-----------------------------------------------------------|----------------------------------------------------------------------------------------------------------------------------------------------------------------------------------------------------------------------------------------------------------------------------------------------------------------------------------------------------------------------------------------------------------------------------------------------------------------------------------------------------------------------------------------------------------------------------------------------------------------------------------------------------------------------------------------------------------------------------------------------------------------------------------------------------------------------------------------------------------------------------------------------------------------------------------------------------------------------------------------------------------------------------------------------------------------------------------------------------------------------------------------------------------------------------------------------------------------------------------------------------------------------------------------------------------------------------------------------------------------------------------------------------------------------------------------------------------------------------------------------------------------------------------------------------------------------------------------------------------------------------------------------------------------------------------------------------------------|

## APPENDIX A — CATEGORIES

### [1] [Categories\\_LikertScale](#)

Categories: 1: Tout à fait d'accord, 2: D'accord, 3: Ni en désaccord ni d'accord, 4: Pas d'accord, 5: Pas du tout d'accord

### [2] [Categories\\_Sensors](#)

Categories: 1: Withings Pulse HR (noir poignet), 2: Tucky thermomètre (blanc tache), 3: Aucune

### [3] [Categories\\_Activity\\_Diary](#)

Categories: 1: travaillant à la ferme, 2: cuisine, 3: vendre des produits sur le marché, 4: élevage d'animaux, 5: prendre soin des enfants, 6: prendre soin de son mari / femme, 7: prendre soin des membres de la famille, 8: va à l'école, 9: chercher de l'eau dans le puits, 10: récolte, 11: travailler sur le terrain, 12: je me reposais, 13: regarder la télévision, 14: aller au bar, 15: aller au restaurant, 16: faire du sport, 17: conduire un véhicule, 18: travaux ménagers, 19: j'ai fait du shopping, 20: nettoyer, 21: travailler assis

### [4] [nom\\_village: Nom du village du participant](#)

Categories: 1: Barakuy, 2: Toni, 3: Biron Bobo, 4: Biron Marka, 5: Boron, 6: Bouni/Boune, 7: Bourasso, 8: Cisse, 9: Dankoumana, 10: Dembelelela, 11: Denissa, 12: Denissa Mossi, 13: Diamasso, 14: Dionkongo, 15: Dina, 16: Dokoura, 17: Goni, 18: Kamadena, 19: Kemena, 20: Kodougou, 21: Koro, 22: Labarani, 23: Lei, 24: Lekuy, 25: Lemini, 26: Nokuy, 27: Ouette, 28: Pa, 29: Sampopo, 30: Seriba, 31: Sien, 32: Sikoro, 33: Sobon, 34: Solimana, 35: Sirakoro/Sirakorosso, 36: Tebere, 37: Tonsere, 38: Zanakuy, 39: Tissi, 40: Dara, 41: Bankoumani<sup>1</sup>, 43: Babekolon, 44: Bagala, 45: Biron badala, 46: Bissau, 47: Bokuy, 48: Damandigui, 49: Hinkuy, 50: Kamiankoro, 51: Kansara, 52: Kerena, 53: Konkuini, 54: Koredougou, 55: Moin si, 56: Mourdie, 57: Sere, 58: Soin, 59: Tonkoroni, 60: BABAKUY, 62: BANGASSI-KORO, 63: BANGASSI-KOUROU, 64: BARANI, 65: NOUNA, 66: BOGO3, 67: BOULEMPORO, 68: BOULE, 69: DIAMAHOUN, 70: DIENWELY, 71: DJALLO, 72: DOURE, 73: GNIMANOU, 74: ILLA, 75: KAMANDADOUGOU, 76: KAREKUY3, 77: KESSEKUY, 78: KINSERE, 79: KOLONKAN GOURE BA, 80: KOLONKAN GOURE DIALLO, 81: KONKORO, 82: KORONI, 83: KOUBE, 84: KOULEROU, 85: MANEKUY, 86: MANTAMOU, 87: MEDOUGOU, 88: NABASSO, 89: NIAKO, 91: OUEMBOYE, 92: OUERESSE, 93: PAMP AKUY, 94: SEKUY, 95: SEKUY-IRA, 96: SOKOURA3, 97: SOUDOGO, 98: TIRA, 99: TOROKOTO, 100: WARIBERE, 101: YALANKORO, 102: BANAKORO, 103: BOGO4, 104: BOMBOROKUY, 105: BOREKUY, 106: DANEKUY, 107: GOMBELE, 108: KOMONKUY, 109: MARIASSO, 110: NIANKOUINI, 111: SADIGAN, 112: SAKO, 113: SOUANKUY, 114: TIRAKUY, 115: YABANA, 116: YALLO, 117: BA, 118: BANANA, 119: BANKOUMANA, 120: BARA, 121: BERKOUÉ, 122: BIDA, 123: BOKORO, 124: BONOUA, 125: BOUAKUY, 126: BOURIO, 127: DIEKUINI, 128: DIENA, 129: DIEKAN, 130: DJIBASSO, 131: DONKORO, 132: FONI-BORONKIN, 133: GNIMINI, 134: IRA, 135: KANSARA, 136: KIENEKUY, 137: KIRA, 138: KIE, 139: KOLONKAN, 140: KOLONKANI-SIRAKORO, 141: KOLONZO5, 142: KOMBORI5, 143: MANDARA, 144: MAOULENA, 145: MASSAKUY, 146: MOUNA, 147: NAIRENA, 148: OUAROKUY, 149: OURA, 150: OUROUKO, 151: PARAKUY, 152: PARANZO, 153: PIA N 1, 154: SABA, 155: SADIGNAKONO, 156: SAKUY, 157: SAMEKUY, 158: SARAKORO, 159: SENOULO, 160: SIEDOUGOU, 161: SOUMOUKUY, 162: SOUNE, 163: SOYE, 164: TIEME, 165: VORO, 166: AYOUB AKOLON, 167: BONIKUY, 168: DAR-ES-SALAM, 169: DASSI, 170: DOKUY, 171: DOUBALE, 172: GASSINGO, 173: ILABEKOLON, 174: KANADOUGOU, 175: KARASSO, 176: KEMENSO, 177: KENEKUY, 178: KOLONIDARA, 179: KOLONKOURA6, 180: MAKUY, 181: NEREKO, 182: SOKOURA6, 183: SOUM, 184: SOUMAKORO, 185: TOMIKORONI, 186: BAMPERLA, 187: BANGASSI-BOBO, 188: BANGASSI-ILLA, 189: BANGASSI-MAMOUDOU, 190: BANKUY, 191: BASSAM, 192: BOANEKUY, 193: BOKUY7, 194: BOUKUY, 195: DAKUY, 196: DOUMBALA, 197: HENLEKUY, 198: KAREKUY7, 199: KIMBA, 200: KINI-KINI, 201: KOA, 202: KODARA, 203: KOLONZO7, 204: KONKUY-BOHO, 205: KONKUY-KORO, 206: KOURKUY, 207: LANFIERA, 208: MONTIONKUY, 209: MOUNAKORO, 210: NIAN, 211: POROKUY, 212: SAINT-CAMILLE, 213: SAINT-MARTIN, 214: SAINT-PAUL, 215: SAWOROKUY, 216: SIMBORA, 217: TENI, 218: TENI-PEULH, 219: TIOURKUY, 220: WANZAN, 221: ZEKUY, 222: ABAYE, 223: AOUREMA8, 224: BA-PEULH, 225: DAGA, 226: GANI, 227: KOLONKANI-BA, 228: KOMBORI8, 229: KONNA, 230: LONANI, 231: MAGADIAN, 232: OUORI, 233: SANAKADOUGOU, 234: SASSAMBARI, 235: SIEKORO, 236: SIEWALI, 237: SIGUIDE, 238: YARAN, 239: BANKOUMANI, 240: BOKUY9, 241: DINA, 242: KIKO, 243: KOLOKAN, 244: MADOUBA, 245: PIA N 2, 246: PORO, 247: TOUBA, 248: YOUNOUNA, 249: AOUREMA1, 250: BARE, 251: DANTIERA, 252: DEMBO, 253: DIGANI, 254: DIONDOUGOU, 255: FARAKUY, 256: KAKI, 257: KALFADOUGOU, 258: KAREKUY1, 260: KOMBARA, 261: KONANKOIRA, 262: KONONIBA, 263: MANI, 264: PATIARAKUY, 265: SAINT-JEAN, 266: SAINT-LOUIS, 267: SIMBADOUGOU, 268: SOA, 269: SOKORO, 270: TENOU, 271: THIA, 272: TOMBODOUGOU, 273: ZOUN, 275: BANTOMBO, 276: BOTTE, 277: KALLE, 278: KOURY, 279: LANFIERA-KOURA, 280: SIELA, 281: SONO, 282: SORO, 283: ZAMPANA, 285: sontorokuy, 286: yevedougou, 288: Homokuy, 289: Daborokuy, 290: Warkuy, 291: Koncoba, 292: Sayokuy, 293: Poe, 295: Werimbere, 296: Noubere

Legend and structure of information in this file

| Name of section                                                                                                                                                                                                                                                                                                        |                                                                                                        | Type of question, scope                                                                                                                                                                                                                                              |  | Variable name        |
|------------------------------------------------------------------------------------------------------------------------------------------------------------------------------------------------------------------------------------------------------------------------------------------------------------------------|--------------------------------------------------------------------------------------------------------|----------------------------------------------------------------------------------------------------------------------------------------------------------------------------------------------------------------------------------------------------------------------|--|----------------------|
| Enabling condition for this section                                                                                                                                                                                                                                                                                    | Question title                                                                                         | Answer options                                                                                                                                                                                                                                                       |  |                      |
| E s4_other_sources_which.Contains(98)                                                                                                                                                                                                                                                                                  | SECTION 5: OTHER INCOME SOURCES                                                                        |                                                                                                                                                                                                                                                                      |  |                      |
|                                                                                                                                                                                                                                                                                                                        | Duis aute irure dolor in reprehenderit in voluptate velit esse cillum dolore eu fugiat nulla pariatur? | MULTI-SELECT<br>SCOPE: PREFILLED                                                                                                                                                                                                                                     |  | s4_re1_leaders_other |
| I This refers to family relations<br>E s3_time_other > 0<br>V1 s4_re1_leaders_which.Contains(98)<br>M1 Can not be itself<br>V2 (s3_time_other_breeding_advice <= (50 - s3_time_art_insem_advice))    s3_time_other_breeding_advice == 0<br>M2 This person is not in the list<br>F optioncode != s5_ignored_option_code |                                                                                                        | 01 <input type="checkbox"/> Community animal health workers<br>02 <input type="checkbox"/> Private<br>03 <input type="checkbox"/> Government<br>04 <input type="checkbox"/> Livestock keepers association<br>05 <input type="checkbox"/> NGO<br><br>And 5 other [13] |  |                      |
| Additional information:<br>"I" – Question instruction<br>"E" – Enabling condition<br>"V1" – Validation condition №1<br>"M1" – Message for validation №1<br>"F" – Filter in Categorical questions                                                                                                                       |                                                                                                        | Link to full set in appendix                                                                                                                                                                                                                                         |  |                      |

Breadcrumbs

| Type or roster                                                                            |
|-------------------------------------------------------------------------------------------|
| Roster Title                                                                              |
| CHAPTER 3 IDENTIFICATION /<br>Roster: LEADER RELATION DETAILS<br>generated by fixed list: |
| 01 Ward Livestock Officer                                                                 |
| 02 Village Livestock Officer                                                              |
| 99 Other (specify)                                                                        |
| List items                                                                                |

Shared with:  
RUguillaume (never edited)  
sandrabarteit (never edited)  
MaraK (never edited)

# Questionnaire sur la chaleur CP1-P5

---

## SURVEY IDENTIFICATION INFORMATION QUESTIONNAIRE DESCRIPTION

### DÉTAILS DES PARTICIPANTS À L'ÉTUDE

No sub-sections, No rosters, Questions: 2.

### INFORMATION SUR LA CHALEUR

No sub-sections, No rosters, Questions: 13.

### APPENDIX A — CATEGORIES

### LEGEND

SURVEY IDENTIFICATION INFORMATION  
QUESTIONNAIRE DESCRIPTION

Basic information

Title Questionnaire sur la chaleur CP1-P5

Survey data information

Study type Integrated Survey

Kind of data Aggregate data [agg]

Survey information

Country Burkina Faso

Year 2020

Languages French

Funding DFG

# DÉTAILS DES PARTICIPANTS À L'ÉTUDE

study\_part\_details

|                                                                                                            |                                                                                                                                                                                                                                                                                                                                                                                                                                                                                                                                                                                                                                                                                                                                                                                                                                    |
|------------------------------------------------------------------------------------------------------------|------------------------------------------------------------------------------------------------------------------------------------------------------------------------------------------------------------------------------------------------------------------------------------------------------------------------------------------------------------------------------------------------------------------------------------------------------------------------------------------------------------------------------------------------------------------------------------------------------------------------------------------------------------------------------------------------------------------------------------------------------------------------------------------------------------------------------------|
| <div>Fournir l'ID du participant à l'étude</div> <div>I Veuillez Saisir l'identifiant du participant</div> | <div>TEXT</div> <div>study_part_id</div> <div></div>                                                                                                                                                                                                                                                                                                                                                                                                                                                                                                                                                                                                                                                                                                                                                                               |
| <div>Nom du village du participant</div>                                                                   | <div>SINGLE-SELECT: COMBO BOX</div> <div>nom_village</div> <div><div>02 <input type="radio"/> Toni</div><div>05 <input type="radio"/> Boron</div><div>08 <input type="radio"/> Cissé</div><div>09 <input type="radio"/> Dankoumana</div><div>10 <input type="radio"/> Dembeléla</div><div>11 <input type="radio"/> Denissa</div><div>12 <input type="radio"/> Denissa Mossi</div><div>14 <input type="radio"/> Dionkongo</div><div>15 <input type="radio"/> Dina</div><div>16 <input type="radio"/> Dokoura</div><div>17 <input type="radio"/> Goni</div><div>18 <input type="radio"/> Kamadena</div><div>19 <input type="radio"/> Kèmena</div><div>21 <input type="radio"/> Koro</div><div>23 <input type="radio"/> Leï</div><div>27 <input type="radio"/> Ouetté</div></div> <div><a href="#">And 43 other symbols [4]</a></div> |

# INFORMATION SUR LA CHALEUR

info\_ch

|                                                                                                                                                                                                                                    |                                                                                                                                                                                                                                                                                                                                                                                                                                                                                                                                                                                                                        |
|------------------------------------------------------------------------------------------------------------------------------------------------------------------------------------------------------------------------------------|------------------------------------------------------------------------------------------------------------------------------------------------------------------------------------------------------------------------------------------------------------------------------------------------------------------------------------------------------------------------------------------------------------------------------------------------------------------------------------------------------------------------------------------------------------------------------------------------------------------------|
| <p>Pour certaines personnes, leur corps se sent stressé pendant la chaleur et ils ont l'impression que cela les affecte. Considérez-vous la chaleur comme un problème pour votre santé et votre corps dans votre vie courante?</p> | <p>SINGLE-SELECT <span>ch1</span></p> <p>01 <input type="radio"/> Oui</p> <p>02 <input type="radio"/> Non</p>                                                                                                                                                                                                                                                                                                                                                                                                                                                                                                          |
| <p>Si oui, dans quelle situation cela vous impacte-t-il le plus?</p> <p>E ch1==1</p>                                                                                                                                               | <p>MULTI-SELECT <span>ch2</span></p> <p>01 <input type="checkbox"/> Pendant la nuit</p> <p>02 <input type="checkbox"/> Du matin</p> <p>03 <input type="checkbox"/> A midi</p> <p>04 <input type="checkbox"/> A l'après-midi</p> <p>05 <input type="checkbox"/> Dans la soirée</p> <p>06 <input type="checkbox"/> Pendant le travail à l'extérieur</p> <p>07 <input type="checkbox"/> Pendant le travail à l'intérieur de la maison</p> <p>08 <input type="checkbox"/> En allant chercher de l'eau</p> <p>09 <input type="checkbox"/> Pendant un travail épuisant/exigeant</p> <p>10 <input type="checkbox"/> Autre</p> |
| <p>Autre a preciser</p> <p>E ch2.Contains(10)</p>                                                                                                                                                                                  | <p>TEXT <span>ch2_autre</span></p> <p>.....</p>                                                                                                                                                                                                                                                                                                                                                                                                                                                                                                                                                                        |
| <p>Comment la chaleur vous affecte-t-elle?</p> <p>E ch1==1</p>                                                                                                                                                                     | <p>MULTI-SELECT <span>ch3</span></p> <p>01 <input type="checkbox"/> épuisement</p> <p>02 <input type="checkbox"/> transpiration</p> <p>03 <input type="checkbox"/> mauvais sommeil</p> <p>04 <input type="checkbox"/> fatigue</p> <p>05 <input type="checkbox"/> Autre</p>                                                                                                                                                                                                                                                                                                                                             |
| <p>Autre a preciser</p> <p>E ch3.Contains(5)</p>                                                                                                                                                                                   | <p>TEXT <span>ch3_autre</span></p> <p>.....</p>                                                                                                                                                                                                                                                                                                                                                                                                                                                                                                                                                                        |

|                                                                                                      |                                                                                                                                                                                                                                                                                                                                                                                                                                                                                                                                                                                                                                                                                                                                                                                                                                                                                                                                                                                                                                                                                                                                                                                                                                                                                                                                                                                                                                                                                                                                                                                                                                                                                                     |
|------------------------------------------------------------------------------------------------------|-----------------------------------------------------------------------------------------------------------------------------------------------------------------------------------------------------------------------------------------------------------------------------------------------------------------------------------------------------------------------------------------------------------------------------------------------------------------------------------------------------------------------------------------------------------------------------------------------------------------------------------------------------------------------------------------------------------------------------------------------------------------------------------------------------------------------------------------------------------------------------------------------------------------------------------------------------------------------------------------------------------------------------------------------------------------------------------------------------------------------------------------------------------------------------------------------------------------------------------------------------------------------------------------------------------------------------------------------------------------------------------------------------------------------------------------------------------------------------------------------------------------------------------------------------------------------------------------------------------------------------------------------------------------------------------------------------|
| <p>Que faites-vous pour vous protéger de la chaleur lorsque vous êtes à l'intérieur/à la maison?</p> | <div> <div>MULTI-SELECT</div> <div>ch4</div> <div> <div>01</div> <div><input type="checkbox"/></div> <div>Rien</div> </div> <div> <div>02</div> <div><input type="checkbox"/></div> <div>Boire plus d'eau</div> </div> <div> <div>03</div> <div><input type="checkbox"/></div> <div>Se reposer</div> </div> <div> <div>04</div> <div><input type="checkbox"/></div> <div>Effectuer les travaux les plus pénibles pendant les heures les plus fraîches de la journée (le matin, le soir, etc.) ou par une journée plus fraîche</div> </div> <div> <div>05</div> <div><input type="checkbox"/></div> <div>Laisser la porte/fenêtre ouverte pour la ventilation</div> </div> <div> <div>06</div> <div><input type="checkbox"/></div> <div>Dormir dans un endroit plus frais/à l'extérieur</div> </div> <div> <div>07</div> <div><input type="checkbox"/></div> <div>Aller dans un lieu public climatisé</div> </div> <div> <div>08</div> <div><input type="checkbox"/></div> <div>Se baigner fréquemment</div> </div> <div> <div>09</div> <div><input type="checkbox"/></div> <div>Mouiller les vêtements</div> </div> <div> <div>10</div> <div><input type="checkbox"/></div> <div>Planter des arbres/plantes près de la maison pour plus de fraîcheur/ombre</div> </div> <div> <div>11</div> <div><input type="checkbox"/></div> <div>Utilisez des stores/rideaux pour garder la maison fraîche</div> </div> <div> <div>12</div> <div><input type="checkbox"/></div> <div>Rester à l'intérieur</div> </div> <div> <div>13</div> <div><input type="checkbox"/></div> <div>Utilisez un ventilateur</div> </div> <div> <div>14</div> <div><input type="checkbox"/></div> <div>Autre</div> </div> </div> |
|------------------------------------------------------------------------------------------------------|-----------------------------------------------------------------------------------------------------------------------------------------------------------------------------------------------------------------------------------------------------------------------------------------------------------------------------------------------------------------------------------------------------------------------------------------------------------------------------------------------------------------------------------------------------------------------------------------------------------------------------------------------------------------------------------------------------------------------------------------------------------------------------------------------------------------------------------------------------------------------------------------------------------------------------------------------------------------------------------------------------------------------------------------------------------------------------------------------------------------------------------------------------------------------------------------------------------------------------------------------------------------------------------------------------------------------------------------------------------------------------------------------------------------------------------------------------------------------------------------------------------------------------------------------------------------------------------------------------------------------------------------------------------------------------------------------------|

E ch4.Contains(14)

E ch5.Contains(13)

|                                                                                                                                            |                                                                                                                                                                                                                     |
|--------------------------------------------------------------------------------------------------------------------------------------------|---------------------------------------------------------------------------------------------------------------------------------------------------------------------------------------------------------------------|
| Travaillez-vous principalement à l'intérieur ou à l'extérieur?                                                                             | <div>SINGLE-SELECT <span>ch6</span></div> <div>01 <input type="radio"/> à l'intérieur</div> <div>02 <input type="radio"/> à l'extérieur</div> <div>03 <input type="radio"/> Les deux (intérieur et extérieur)</div> |
| Y a-t-il d'autres conditions météorologiques extrêmes qui vous affectent négativement ?                                                    | <div>SINGLE-SELECT <span>ch7</span></div> <div>01 <input type="radio"/> Oui</div> <div>02 <input type="radio"/> Non</div>                                                                                           |
| si oui, comment? (par exemple, inondation lors de fortes pluies) Notez la météo et l'effet sur le participant s'il vous plaît.<br>E ch7==1 | <div>TEXT <span>ch8</span></div> <div>.....</div>                                                                                                                                                                   |
| Coordonnées GPS du menage du participant                                                                                                   | <div>GPS <span>ch7_gps</span></div> <div> <div>.....</div> <div>N</div> <div>.....</div> <div>W</div> <div>.....</div> <div>A</div> </div>                                                                          |

## APPENDIX A — CATEGORIES

[1] [Categories\\_LikertScale](#)

Categories: 1: Tout à fait d'accord, 2: D'accord, 3: Ni en désaccord ni d'accord, 4: Pas d'accord, 5: Pas du tout d'accord

[2] [Categories\\_Sensors](#)

Categories: 1: Withings Pulse HR (noir poignet), 2: Tucky thermomètre (blanc tache), 3: Aucune

[3] [Categories\\_Activity\\_Diary](#)

Categories: 1: travaillant à la ferme, 2: cuisine, 3: vendre des produits sur le marché, 4: élevage d'animaux, 5: prendre soin des enfants, 6: prendre soin de son mari / femme, 7: prendre soin des membres de la famille, 8: va à l'école, 9: chercher de l'eau dans le puits, 10: récolte, 11: travailler sur le terrain, 12: je me reposais, 13: regarder la télévision, 14: aller au bar, 15: aller au restaurant, 16: faire du sport, 17: conduire un véhicule, 18: travaux ménagers, 19: j'ai fait du shopping, 20: nettoyer, 21: travailler assis

[4] [nom\\_village: Nom du village du participant](#)

Categories: 2: Toni, 5: Boron, 8: Cissé, 9: Dankoumana, 10: Dembeléla, 11: Denissa, 12: Denissa Mossi, 14: Dionkongo, 15: Dina, 16: Dokoura, 17: Goni, 18: Kamadena, 19: Kèmena, 21: Koro, 23: Leï, 27: Ouetté, 28: Pa, 29: Sampopo, 30: Seriba, 31: Sien, 33: Sobon, 34: Solimana, 36: Tebé ré, 37: Tonséré, 39: Tissi, 40: Dara, 41: Bankoumani, 42: Nouna, 43: Babekolon, 44: Bagala, 45: Biron badala, 46: Bissau, 47: Bokuy, 48: Daman digui, 49: Hinkuy, 51: Kansara, 52: Kéréna, 53: Konkuini, 54: Korédougou, 55: Moinsi, 56: Mourdié, 57: Sèrè, 58: Soin, 59: Tonkoroni, 1: Barakuy, 3: Biron-Bobo, 4: Biron-Marka, 6: Bouni/Bouné, 7: Bourasso, 13: Diamasso, 20: Kodougou, 22: Labarani, 24: Lekuy, 25: Lemini, 26: Nokuy, 32: Sikoro, 35: Sirakoro/Sirakorosso, 38: Zanakuy, 50: Kamiankoro

Legend and structure of information in this file

| Name of section                                                                                                                                                                                                                                                                                                        |                                 | Type of question, scope                                                                                                                                                                                                                                              |  | Variable name        |
|------------------------------------------------------------------------------------------------------------------------------------------------------------------------------------------------------------------------------------------------------------------------------------------------------------------------|---------------------------------|----------------------------------------------------------------------------------------------------------------------------------------------------------------------------------------------------------------------------------------------------------------------|--|----------------------|
| Enabling condition for this section                                                                                                                                                                                                                                                                                    | Question title                  | Answer options                                                                                                                                                                                                                                                       |  |                      |
| E s4_other_sources_which.Contains(98)                                                                                                                                                                                                                                                                                  | SECTION 5: OTHER INCOME SOURCES |                                                                                                                                                                                                                                                                      |  |                      |
| Duis aute irure dolor in reprehenderit in voluptate velit esse cillum dolore eu fugiat nulla pariatur?                                                                                                                                                                                                                 |                                 | MULTI-SELECT<br>SCOPE: PREFILLED                                                                                                                                                                                                                                     |  | s4_rel_leaders_other |
| I This refers to family relations<br>E s3_time_other > 0<br>V1 s4_rel_leaders_which.Contains(98)<br>M1 Can not be itself<br>V2 (s3_time_other_breeding_advice <= (50 - s3_time_art_insem_advice))    s3_time_other_breeding_advice == 0<br>M2 This person is not in the list<br>F optioncode != s5_ignored_option_code |                                 | 01 <input type="checkbox"/> Community animal health workers<br>02 <input type="checkbox"/> Private<br>03 <input type="checkbox"/> Government<br>04 <input type="checkbox"/> Livestock keepers association<br>05 <input type="checkbox"/> NGO<br><br>And 5 other [13] |  |                      |
| Additional information:<br>"I" – Question instruction<br>"E" – Enabling condition<br>"V1" – Validation condition №1<br>"M1" – Message for validation №1<br>"F" – Filter in Categorical questions                                                                                                                       |                                 | Link to full set in appendix                                                                                                                                                                                                                                         |  |                      |

Breadcrumbs

| Type or roster                                                                            |
|-------------------------------------------------------------------------------------------|
| CHAPTER 3 IDENTIFICATION /<br>Roster: LEADER RELATION DETAILS<br>generated by fixed list: |
| 01 Ward Livestock Officer                                                                 |
| 02 Village Livestock Officer                                                              |
| 99 Other (specify)                                                                        |
| List items                                                                                |
